# Supplementary material
Source: ML conference proceedings conference paper supplement (https://openreview.net/forum?id=iNB4uoFQJb)
Supplement: supplementary_material [file attachment]

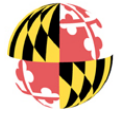

# UNIVERSITY OF MARYLAND

INSTITUTIONAL REVIEW BOARD

1204 Marie Mount Hall  
College Park, MD 20742-5125  
TEL 301.405.4212  
FAX 301.314.1475  
irb@umd.edu  
www.umresearch.umd.edu/IRB

DATE: May 17, 2024

TO: Furong Huang  
FROM: University of Maryland College Park (UMCP) IRB

PROJECT TITLE: [2185847-2] Easy to Hard AI Models

SUBMISSION TYPE: Amendment/Modification

ACTION: DETERMINATION OF EXEMPT STATUS

DECISION DATE: May 17, 2024

REVIEW CATEGORY: Exemption category #45 CFR 46.104(d)(3)(i)(A-B).

Thank you for your submission of Amendment/Modification materials for this project. The University of Maryland College Park (UMCP) IRB has determined this project is EXEMPT FROM IRB REVIEW according to federal regulations.

We will retain a copy of this correspondence within our records.

If you have any questions, please contact the IRB Office at 301-405-4212 or [irb@umd.edu](mailto:irb@umd.edu). Please include your project title and reference number in all correspondence with this committee.

This letter has been electronically signed in accordance with all applicable regulations, and a copy is retained within University of Maryland College Park (UMCP) IRB's records.
